# Supplementary material for: Controllable Morphology and Photocatalytic Performance of Bismuth Silicate Nanobelts/Nanosheets
Source: Royal Society of Chemistry journal article supplement (doi:10.1039/c1ra00188d), 2011-01-01
Supplement: c1ra00188d.pdf [file c1ra00188d.pdf]

## Supporting Information

### Controllable Morphology and Photocatalytic Performance of Bismuth Silicate Nanobelts/Nanosheets

Peiyang Zhang, Juncheng Hu\* and Jinlin Li

Key Laboratory of Catalysis and Materials Science of the State Ethnic Affairs Commission & Ministry of Education, Hubei Province, South-Central University for Nationalities, Wuhan, China.

Fax: 86 27 67841302; Tel: 86 27 67842752; E-mail:junchenghuhu@hotmail.com.

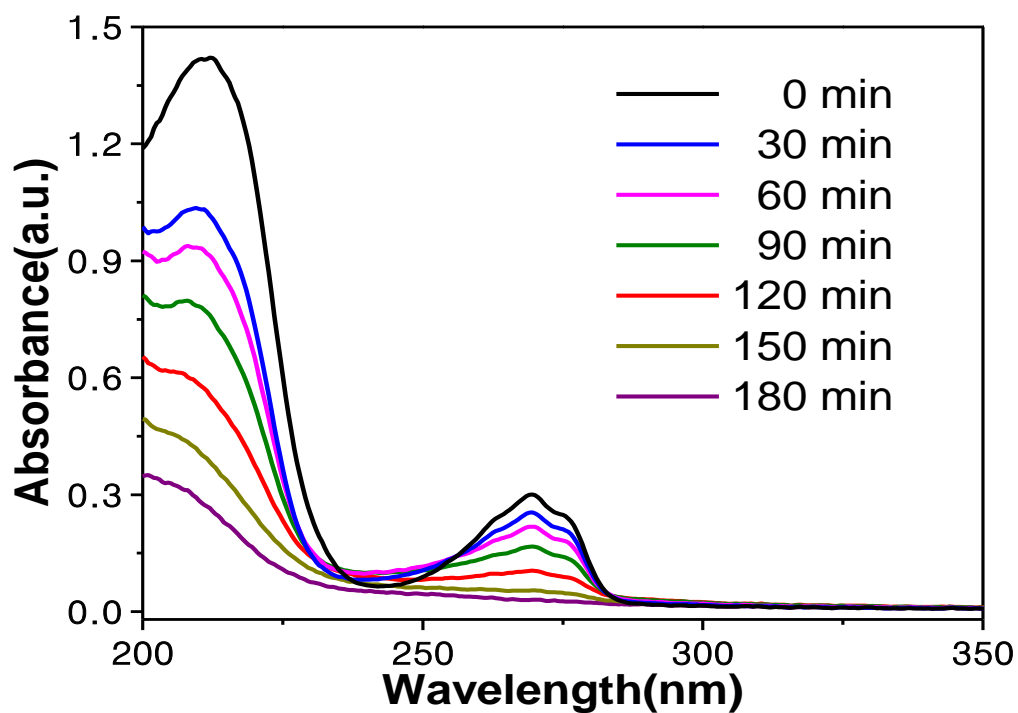

Fig. S1 The temporal evolution of the spectra during the photodegradation of phenol (initial concentration: 20 mg/L, 50 mL) over  $S_1$  under simulative sunlight illumination.
